# Supplementary material for: Boric acid-crosslinked poly(vinyl alcohol): biodegradable, biocompatible, robust, and high-barrier paper coating
Source: Royal Society of Chemistry journal article supplement (doi:10.1039/d4gc00618f), 2024-01-01
Supplement: d4gc00618f1.pdf [file d4gc00618f1.pdf]

## Supporting Information

### **Boric acid-crosslinked poly(vinyl alcohol): biodegradable, biocompatible, robust, and high-barrier paper coating**

Shinhyeong Choe,<sup>a</sup> Seulki You,<sup>b</sup> Kitae Park,<sup>c</sup> Youngju Kim,<sup>a,b</sup> Jehee Park,<sup>a</sup> Yongjun Cho,<sup>a</sup> Jongchul Seo,<sup>c</sup> Hanseul Yang,<sup>b</sup> and Jaewook Myung\*<sup>a</sup>

correspondence to: [jjaimyung@kaist.ac.kr](mailto:jjaimyung@kaist.ac.kr)

<sup>a</sup>. Department of Civil and Environmental Engineering, KAIST, Daejeon, 34141, Republic of Korea

<sup>b</sup>. Department of Biological Sciences, KAIST, Daejeon, 34141, Republic of Korea

<sup>c</sup>. Department of Packaging & Logistics, Yonsei University, 1 Yonseidae-gil, Wonju-si, Gangwon-do 26493, Republic of Korea

#### **This supporting information file includes:**

Text S1 to S3

Table S1 to S3

Fig. S1 to S6

### Text S1. Calculation for mineralization levels.

The biodegradation behavior of coated papers (KP-P, KP-PB, and KP-PBH) was assessed by the degree of carbon mineralization into CO<sub>2</sub>, employing a systematically designed respirometer, as previously stated.<sup>1</sup> The total carbon content (%) of each sample was determined as an average of 3 respective measurements through a FLASH 2000 series elemental analyzer (Thermo Fisher Scientific, Waltham, MA, USA). Theoretical CO<sub>2</sub> amount as a result of complete mineralization (CO<sub>2,th</sub>) was then calculated by multiplying the sample weight (W<sub>s</sub>) by the carbon content.

$$\text{CO}_{2,\text{th}}(\text{mg}) = W_s (\text{mg}) \times C (\%) \times \frac{44 \text{ mg CO}_2}{12 \text{ mg C}}$$

When the respired CO<sub>2</sub> passes through the 100 mL of 12.5 mM Ba(OH)<sub>2</sub> solution, a precipitate (BaCO<sub>3</sub>) forms.

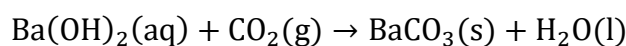

Periodically, the change of buffer capacity in Ba(OH)<sub>2</sub> was evaluated *via* Orion Star T900 automatic titrator (Thermo Fisher Scientific, MA, USA), using 50 mM HCl as a titrant.

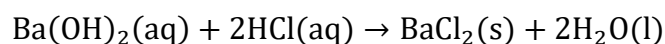

Accordingly, 1 mole of produced CO<sub>2</sub> is equivalent to 2 moles of consumed HCl. The Ba(OH)<sub>2</sub> solution was filtered with a 0.45 μm cellulose acetate filter to remove BaCO<sub>3</sub> precipitates and a 30 mL aliquot was titrated. The produced CO<sub>2</sub> is calculated as follows:

$$\text{CO}_2 (\text{mmol}) = \text{Ba}(\text{OH})_{2,\text{i}} (\text{mmol}) - \frac{\text{HCl} (\text{mmol})}{2} \times \frac{\text{Ba}(\text{OH})_{2,\text{o}} (\text{mL})}{\text{Ba}(\text{OH})_{2,\text{a}} (\text{mL})}$$

where CO<sub>2</sub> is the respired CO<sub>2</sub> from a bioreactor, and Ba(OH)<sub>2,i</sub> is the initial concentration of Ba(OH)<sub>2</sub> solution (12.5 mM). HCl is the concentration of titrant (50 mM). Ba(OH)<sub>2,o</sub> indicates the final volume of Ba(OH)<sub>2</sub> at the time of titration. Ba(OH)<sub>2,a</sub> is the aliquot volume used for titration (30 mL). The difference in respired CO<sub>2</sub> between the blank (containing only inoculum) and samples is considered as a net CO<sub>2</sub> production pertaining to the biodegradation, as follows:

$$\text{mineralization} (\%) = \frac{(\text{CO}_{2,\text{s}} (\text{mg}) - \text{CO}_{2,\text{b}} (\text{mg}))}{\text{CO}_{2,\text{th}} (\text{mg})} \times 100$$

where CO<sub>2,s</sub> and CO<sub>2,b</sub> are the average of produced CO<sub>2</sub> from the sample and blank bioreactors in milligrams, respectively.

## Text S2. Calculation for *E* factor.

The *E* factor (Environmental factor) is defined as the mass ratio of total waste to total product during the manufacturing process. The *E* factor can be expressed as:

$$E \text{ factor} = \frac{\text{total waste (g)}}{\text{total product (g)}}$$

To evaluate the *E* factor of coated papers, the mass of chemicals used in the fabrication process (*i.e.*, BA, HCl, ECH solutions) was used for the calculation (Table S1). The primary assumption applied for the calculations is that 90% of chemicals are recycled and the density of solutions is 1 g/mL. For instance, the *E* factor of KP-PBH is calculated as follows:

$$E \text{ factor} = \frac{0.1[(10 + 100) + (0.5 + 25) + (0.5) + (1 + 99)]}{x} = 23.6/x$$

Where:

- Mass of PVA solution in grams (10 g PVA in 100 ml water)
- Mass of BA solution in grams (0.5 g BA in 25 ml water)
- Mass of HCl solution in grams (0.5 g)
- Mass of ECH solution in grams (100 g)
- Mass of desired product in grams (*x*)

We fabricated twenty A4-sized ( $W0.21 \times H0.297$  m) KP-PBH using the chemical solutions. Subsequently, the mass of the product (KP-PBH) can be calculated by multiplying the total area by its basic weight ( $\text{g/m}^2$ ), utilizing the density of KP-PBH reported in an earlier study ( $110 \text{ g/m}^2$ ).<sup>2</sup>

$$\text{Total area} = 20 \times (0.21 \text{ m} \times 0.297 \text{ m}) = 1.25 \text{ m}^2$$

$$\text{Total mass} = \frac{110 \text{ g}}{\text{m}^2} \times 1.25 \text{ m}^2 = 137.5 \text{ g}$$

Accordingly, the *E* factor of KP-PBH is 0.17.

### **Text S3. Scanning electron microscopy (SEM).**

The coated papers (KP-P, KP-PB, and KP-PBH) strips immersed in seawater/sediment mixture were retrieved after 60 d of the microcosm experiment. The samples were transferred into a freshly prepared 2.5% paraformaldehyde-glutaraldehyde fixing solution buffered with 0.1 M phosphate buffer (pH 7.2) for 2 h and washed with the same buffer for 10 min. The samples were postfixed in 1% osmium tetroxide in the 0.1 M phosphate buffer at 25 °C for 1 h. The samples were then dehydrated with a series of increasing concentrations of ethanol/isoamyl acetate solutions (30, 50, 70, 80, 98, and 100% for 10 min, respectively), followed by critical point drying in liquid CO<sub>2</sub> *via* EM CPD300 (Leica, Germany). Finally, the samples were sputtered with gold in a sputter coater SC502 (POLARON, Canada) and observed using the scanning electron microscope FEI Quanta 250 FEG (FEI, USA) at a magnification of 2500–10000×. The surface morphology of both sides (*i.e.*, coated and uncoated) was observed in order to discriminate the microbial colonization patterns.

**Table S1.** Oxygen transmission rate (OTR), water vapor transmission rate (WVTR), oil resistance, tensile strength, and fracture load of the coated papers (KP-P, KP-PB, and KP-PBH). OTR: oxygen transmission rate. WVTR: water vapor transmission rate. RH: relative humidity. N.A.: not applicable.

| Sample | Barrier properties            |                               |                                | Mechanical properties                  |                                         |                                   |
|--------|-------------------------------|-------------------------------|--------------------------------|----------------------------------------|-----------------------------------------|-----------------------------------|
|        | OTR<br>(cc/m <sup>2</sup> ·d) | WVTR<br>(g/m <sup>2</sup> ·d) | Oil<br>resistance<br>(Kit No.) | Tensile<br>strength<br>(0% RH,<br>MPa) | Tensile<br>strength<br>(80% RH,<br>MPa) | Fracture load<br>(50% RH,<br>kPa) |
| KP     | N.A.                          | N.A.                          | 1                              | 31.4 ± 3.2                             | 26.1 ± 3.5                              | 199.4 ± 3.1                       |
| KP-P   | 5.30 ± 0.50                   | 50.7 ± 4.0                    | 12                             | 40.3 ± 2.1                             | 24.2 ± 3.9                              | 319.7 ± 12.7                      |
| KP-PB  | 1.92 ± 0.04                   | 28.0 ± 3.6                    | 12                             | 45.1 ± 1.7                             | 38.8 ± 2.5                              | 361.8 ± 10.1                      |
| KP-PBH | 0.89 ± 0.03                   | 5.2 ± 0.4                     | 12                             | 53.0 ± 4.8                             | 51.9 ± 1.2                              | 462.6 ± 42.2                      |

**Table S2.** Biodegradation test results. The values were calculated on 111 d of the marine biodegradation test. The values are the averages of duplicates. The rate constant ( $k$ ,  $\text{d}^{-1}$ ) was assessed assuming that the biodegradation behavior of the coated papers follows the first-order decay model<sup>3-5</sup>.

| <b>Test material</b> | <b>Carbon content (%)</b> | <b>Theoretical CO<sub>2</sub> (mg)</b> | <b>Respired CO<sub>2</sub> (mg)</b> | <b>Mineralization (%)</b> | <b><math>k</math> (<math>\text{d}^{-1}</math>)</b> |
|----------------------|---------------------------|----------------------------------------|-------------------------------------|---------------------------|----------------------------------------------------|
| Blank                | -                         | -                                      | $38.7 \pm 2.40$                     | -                         | -                                                  |
| KP                   | $40.65 \pm 0.08$          | $33.99 \pm 0.07$                       | $66.7 \pm 3.32$                     | $94.4 \pm 14.4$           | 0.029                                              |
| KP-P                 | $45.47 \pm 0.11$          | $43.09 \pm 0.10$                       | $72.70 \pm 7.64$                    | $81.6 \pm 17.0$           | 0.015                                              |
| KP-PB                | $46.73 \pm 0.19$          | $39.41 \pm 0.16$                       | $61.93 \pm 6.33$                    | $59.2 \pm 27.7$           | 0.008                                              |
| KP-PBH               | $46.09 \pm 0.08$          | $34.13 \pm 0.06$                       | $58.18 \pm 6.62$                    | $60.5 \pm 18.4$           | 0.008                                              |

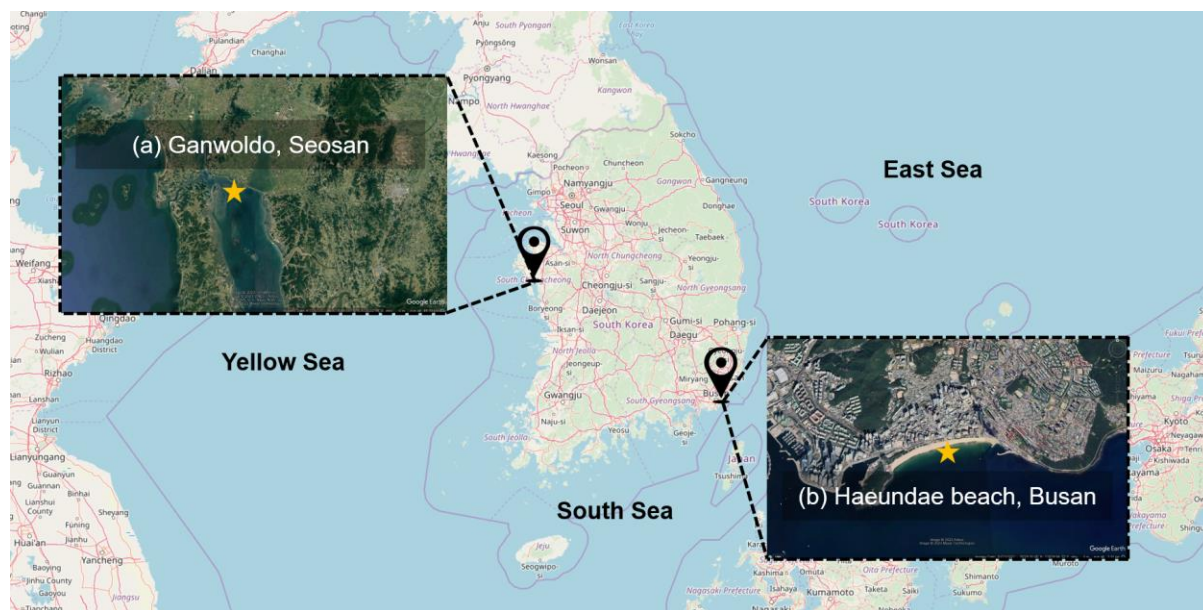

**Fig. S1.** Map of two sampling sites for collecting seawater and sediment (*i.e.*, inoculum) used for marine biodegradation test. (a) Ganwoldo, Seosan, South Korea ( $36^{\circ}36'09''\text{N}$ ,  $126^{\circ}24'42''\text{E}$ ), (b) Haeundae Beach, Busan, South Korea ( $35^{\circ}09'30''\text{N}$ ,  $129^{\circ}09'45''\text{E}$ ). Geologically distinct sites (Yellow and South Sea) were selected as sampling points for microbial heterogeneity. The map was created using OpenStreetMap, and image screenshots were taken from Google Earth.

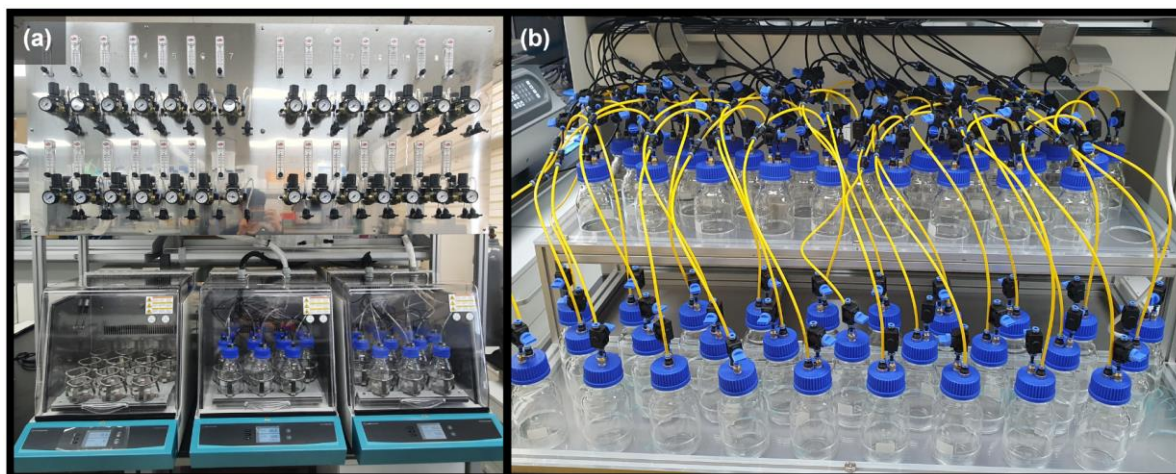

**Fig. S2.** Biodegradation respirometer employed in this study. (a) Gas flow control system and bioreactors in incubators. (b) CO<sub>2</sub> trapping system. The respired CO<sub>2</sub> resulting from the biodegradation was constantly captured in two stages of Ba(OH)<sub>2</sub> solutions and quantified using titration. The detailed scheme of the respirometer can be found in our previous study <sup>1</sup>.



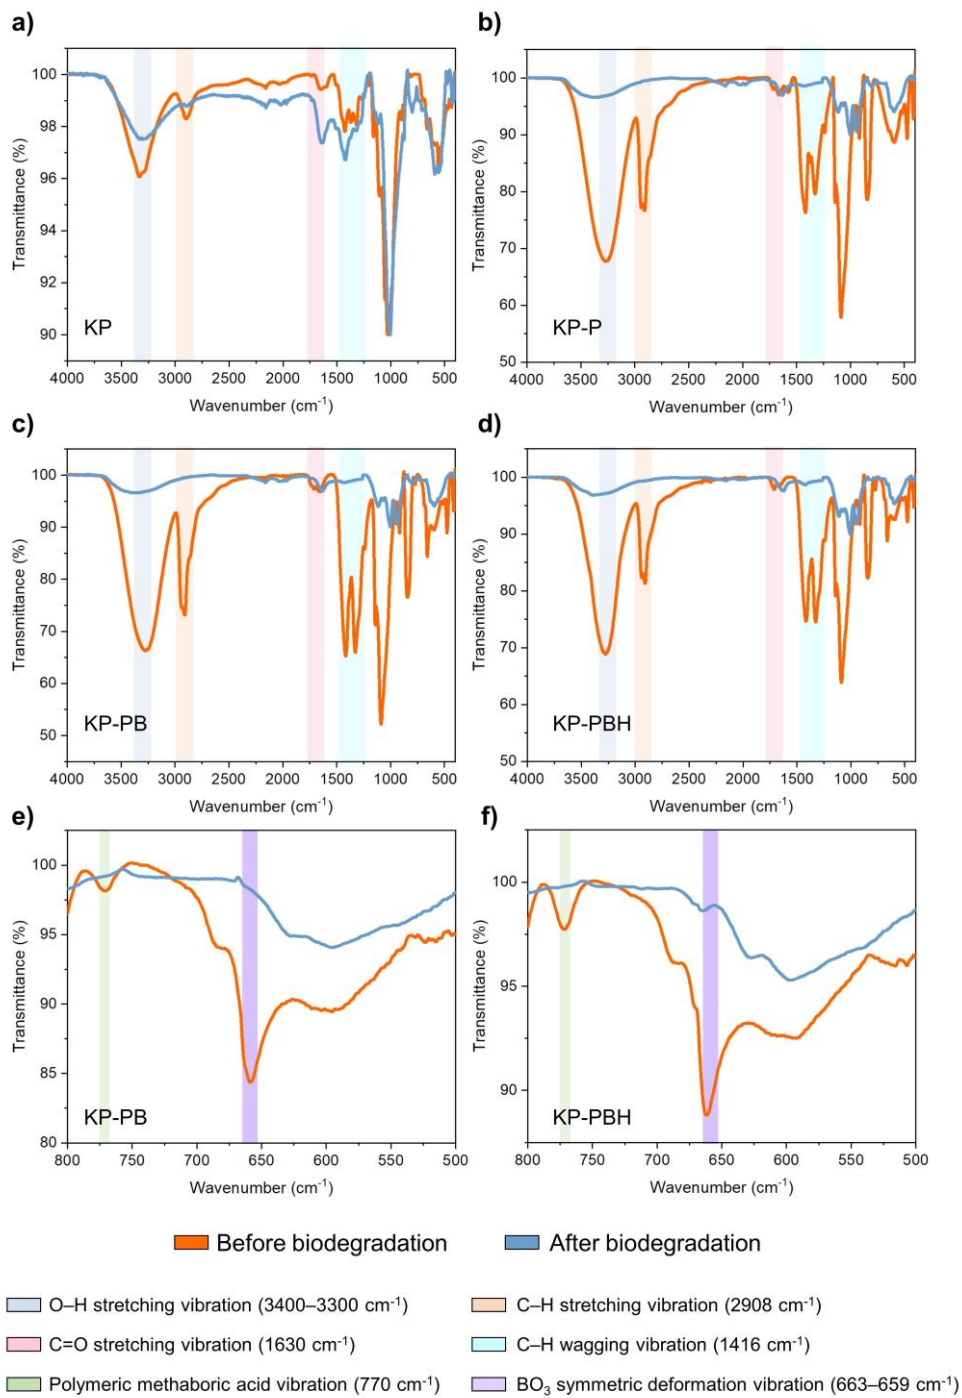

**Fig. S3.** FT-IR graphs of (a) KP, (b) KP-P, (c,e) KP-PB, (d,f) KP-PBH before and after biodegradation test. The shaded regions indicate the characteristic peaks of molecular bonds in the samples.

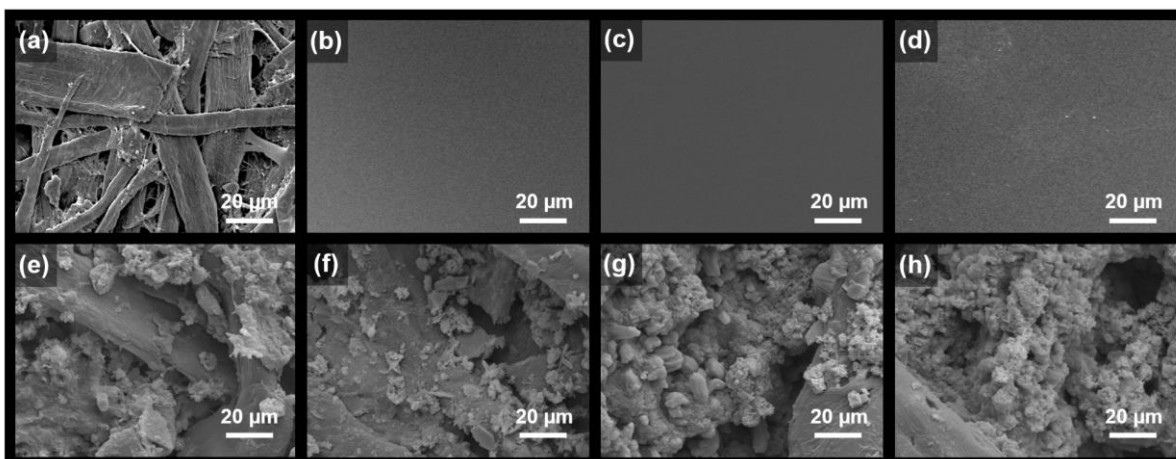

**Fig. S4.** SEM images after biodegradation test. (a and e) KP, (b and f) KP-P, (c and g) KP-PB, and (d and h) KP-PBH. (a and d) Initial samples, (e and h) Residue collected after marine biodegradation test performed for 111 d.

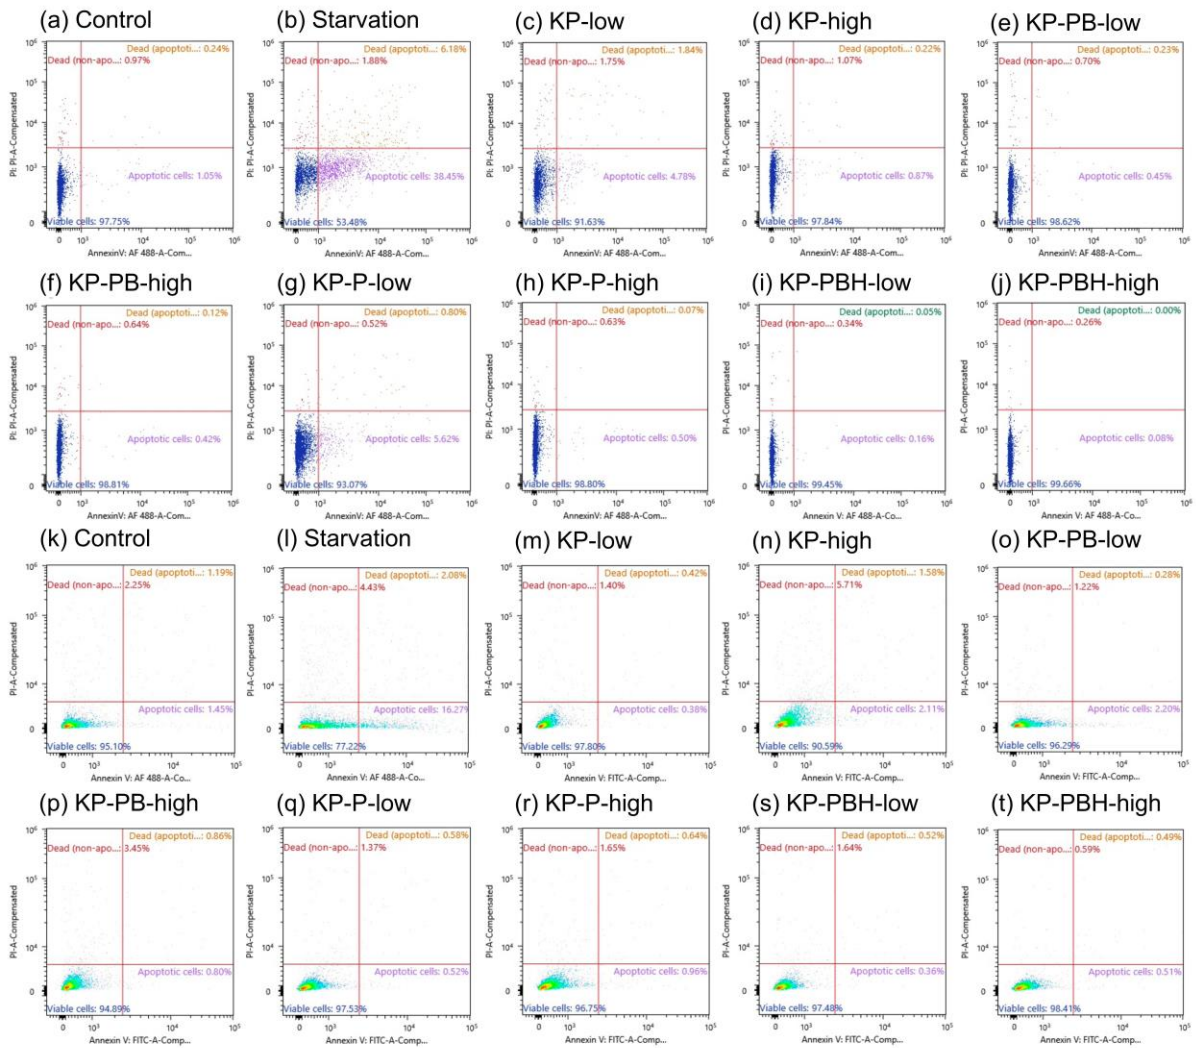

**Fig. S5.** *In vitro* biocompatibility analysis results of coated papers (KP-P, KP-PB, and KP-PBH) with (a-j) Mouse embryonic fibroblast (MEF) and (k-t) Human embryonic kidney (HEK293) cells. Sample concentrations of 0.05 and 0.2 mg/mL are denoted as low and high, respectively.

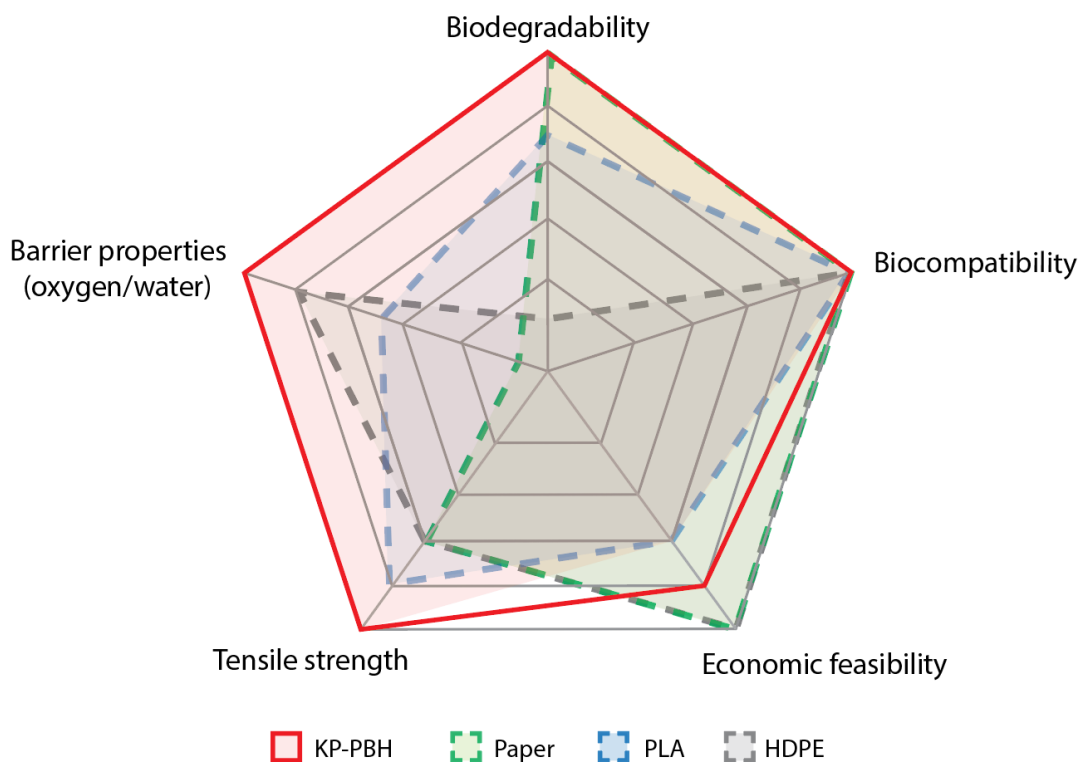

**Fig. S6.** Comparative versatility of KP-PBH compared to other plastics used for hard packaging applications such as Kraft paper, high-density polyethylene (HDPE), and poly(lactic acid) (PLA).

**Table S3.** Key properties and economic feasibility of KP-PBH, Kraft paper (KP), High-density polyethylene (HDPE), and poly(lactic acid). OTR: oxygen transmission rate. WVTR: water vapor transmission rate. PVA: poly(vinyl alcohol)

| Properties                       | KP-PBH                                              | Kraft paper                                      | High-density Polyethylene (HDPE)                 | Poly(lactic acid) (PLA)                                        |
|----------------------------------|-----------------------------------------------------|--------------------------------------------------|--------------------------------------------------|----------------------------------------------------------------|
| Biodegradability                 | Biodegradable in marine environment                 | Biodegradable in marine environment              | Non-biodegradable <sup>6</sup>                   | Biodegradable only in industrial composting <sup>3, 6, 7</sup> |
| Biocompatibility                 | Biocompatible <i>in vitro</i> and <i>in vivo</i>    | Biocompatible <i>in vitro</i> and <i>in vivo</i> | Biocompatible <i>in vitro</i> and <i>in vivo</i> | Biocompatible <i>in vitro</i> and <i>in vivo</i>               |
| Tensile strength (MPa)           | 80                                                  | 25.6                                             | 24–32 <sup>8</sup>                               | 44–65 <sup>3</sup>                                             |
| Barrier properties               | OTR (cc/m <sup>2</sup> ·d)                          | 0.87 <sup>9</sup>                                | 15780                                            | 49.2 <sup>10</sup>                                             |
|                                  | WVTR (g/m <sup>2</sup> ·d)                          | 4.0 <sup>9</sup>                                 | 790                                              | 0.76 <sup>10</sup>                                             |
| Economic feasibility (USD \$/kg) | KP: 0.1–1.0 <sup>12</sup><br>PVA: 1.2 <sup>13</sup> | 0.1–1.0 <sup>12</sup>                            | 0.95–1.18 <sup>8</sup>                           | 3.31–3.53 <sup>8</sup>                                         |

## Reference List

1. S. Choe, Y. Kim, G. Park, D. H. Lee, J. Park, A. T. Mossisa, S. Lee and J. Myung, *ACS Appl. Polym. Mater.*, 2022, **4**, 5077-5090.
2. K. Park, S. Choe, K. Sadeghi, P. K. Panda, J. Myung, D. Kim and J. Seo, *Food Chem.*, 2024, **445**, 138772.
3. G. X. Wang, D. Huang, J. H. Ji, C. Völker and F. R. Wurm, *Adv. Sci.*, 2021, **8**, 2001121.
4. S. Chinaglia, M. Tosin and F. Degli-Innocenti, *Polym. Degrad. Stab.*, 2018, **147**, 237-244.
5. F. Ruggero, R. Gori and C. Lubello, *Waste Manag. Res.*, 2019, **37**, 959-975.
6. O. García-Depraect, R. Lebrero, S. Rodríguez-Vega, S. Bordel, F. Santos-Beneit, L. J. Martínez-Mendoza, R. A. Börner, T. Börner and R. Muñoz, *Bioresour. Technol.*, 2022, **344**, 126265.
7. E. L. Eronen-Rasimus, P. P. Nakki and H. P. Kaartokallio, *Environ. Sci. Technol.*, 2022, **56**, 15760-15769.
8. X. Zhao, K. Cornish and Y. Vodovotz, *Environ. Sci. Technol.*, 2020, **54**, 4712-4732.
9. K. Park, Y. Oh, P. K. Panda and J. Seo, *Prog. Org. Coat.*, 2022, **173**, 107186.
10. M. Sun, S. Zhu, C. Zhang, A. Olah, E. Baer and D. A. Schiraldi, *ACS Appl. Polym. Mater.*, 2019, **1**, 259-266.
11. Y. B. Tee, R. A. Talib, K. Abdan, N. L. Chin, R. K. Basha and K. F. M. Yunus, *BioResources*, 2016, **11**, 1518-1540.
12. Fastmarket, Drop in Unbleached Kraft Paper Prices, <https://www.fastmarkets.com/insights/drop-in-unbleached-kraft-paper-prices>). (accessed April 2023).
13. M. S. Islam, i *Industrial Applications of Biopolymers and their Environmental Impact*, CRC Press, 2020, pp. 135-152.
